# Supplementary material for: Fish Consumption and Risk of Stroke in Chinese Adults: A Prospective Cohort Study in Shanghai, China
Source: MDPI journal article supplement (doi:10.3390/nu14204239), 2022-10-12
Supplement: s1 [file s1]

Supplemental Table S1. Categories and weighted percentage of covariates in the models

| Covariates in models      | Weighted percentages (%) |
|---------------------------|--------------------------|
| Age (years)               | Continuous               |
| Gender                    |                          |
| Male                      | 39.71                    |
| Female                    | 60.29                    |
| Education                 |                          |
| Primary school or below   | 35.90                    |
| Junior high school        | 39.05                    |
| Senior high school        | 15.47                    |
| High school or above      | 9.59                     |
| Marriage status           |                          |
| Married                   | 92.64                    |
| Unmarried                 | 1.50                     |
| Divorced and other        | 5.86                     |
| Retired                   |                          |
| Yes                       | 61.27                    |
| No                        | 38.73                    |
| Smoking status            |                          |
| Never                     | 77.37                    |
| Former                    | 3.66                     |
| Current                   | 18.98                    |
| Alcohol drinking          |                          |
| Never                     | 87.49                    |
| Former                    | 1.09                     |
| Current                   | 11.41                    |
| PA levels (METs-min/week) |                          |
| Less than 3089            | 33.33                    |
| 3090-5040                 | 33.29                    |
| More than 5040            | 33.37                    |
| PSQI score                |                          |
| Less than 2               | 19.25                    |
| 2-4                       | 37.83                    |
| 4 and above               | 42.91                    |
| Energy intake (kcal/day)  |                          |
| Less than 1257.16         | 33.33                    |
| 1257.16-1681.60           | 33.33                    |
| 1681.60 and more          | 33.33                    |
| General obesity           |                          |
| Normal weight             | 50.75                    |
| Overweight                | 37.18                    |

|                           |       |
|---------------------------|-------|
| Obesity                   | 12.07 |
| Fruit (g/day)             |       |
| Less than                 | 81.01 |
| 200-350                   | 15.51 |
| More than 350             | 3.47  |
| Vegetables (g/day)        |       |
| Less than 300             | 57.13 |
| 300-500                   | 27.14 |
| More than 500             | 15.73 |
| Peanuts (g/week)          |       |
| Less than 50              | 60.22 |
| 50-70                     | 4.57  |
| More than 70              | 35.21 |
| Whole grains (g/day)      |       |
| Less than 50              | 89.55 |
| 50 and more               | 10.45 |
| Processed meats           |       |
| Not eat                   | 52.48 |
| Eat                       | 47.52 |
| Unprocessed meats (g/day) |       |
| Less than 40              | 38.27 |
| 40-75                     | 32.53 |
| More than 75              | 29.20 |
| Bean products (g/day)     |       |
| Less than 30              | 68.65 |
| 30-50                     | 10.28 |
| More than 50              | 21.08 |
| Salt (g/day)              |       |
| 5 and less                | 69.98 |
| More than 5               | 30.02 |
| Oil (g/day)               |       |
| Less than 25              | 35.28 |
| 25-30                     | 15.23 |
| More than 30              | 49.49 |
| Hypertension              |       |
| Yes                       | 63.20 |
| No                        | 36.80 |
| CHD                       |       |
| Yes                       | 4.25  |
| No                        | 95.75 |
| Diabetes                  |       |
| Yes                       | 15.01 |
| No                        | 84.99 |
| CKD                       |       |

|                    |       |
|--------------------|-------|
| Yes                | 14.30 |
| No                 | 85.70 |
| Dyslipidemia       |       |
| Yes                | 31.16 |
| No                 | 68.84 |
| COPD               |       |
| Yes                | 0.51  |
| No                 | 99.49 |
| Chronic bronchitis |       |
| Yes                | 6.58  |
| No                 | 93.42 |
| Asthma             |       |
| Yes                | 2.08  |
| No                 | 97.92 |
| HUA                |       |
| Yes                | 16.80 |
| No                 | 83.20 |
| HHcy               |       |
| Yes                | 23.03 |
| No                 | 76.97 |

PA, physical activities; METs, metabolic equivalents; PSQI, Pittsburgh Sleep Quality Index; CHD, coronary heart disease; CKD, chronic kidney disease; HUA, hyperuricemia; HHcy, hyperhomocysteinemia; COPD, chronic obstructive pulmonary disease.

Supplemental Table S2. Hazard ratios (95% CIs) of total stroke, ischemic stroke and hemorrhagic stroke by four categories of fish consumption after excluding deaths within the first two years of follow-up

| Total stroke       | Fish consumption (g/week) |                  |                  |                  | P for trend |
|--------------------|---------------------------|------------------|------------------|------------------|-------------|
|                    | Less than 300             | 300-450          | 450-600          | More than 600    |             |
| Model1             | 1.00                      | 0.74 (0.60-0.89) | 0.79 (0.63-0.99) | 0.92 (0.74-1.14) | 0.13        |
| Model2             | 1.00                      | 0.76 (0.63-0.94) | 0.84 (0.66-1.07) | 1.03 (0.81-1.30) | 0.72        |
| Model3             | 1.00                      | 0.77 (0.63-0.94) | 0.84 (0.66-1.06) | 1.02 (0.80-1.29) | 0.68        |
| Ischemic stroke    |                           |                  |                  |                  |             |
| Model1             | 1.00                      | 0.67 (0.54-0.83) | 0.78 (0.61-0.99) | 0.83 (0.65-1.05) | 0.02        |
| Model2             | 1.00                      | 0.69 (0.55-0.86) | 0.82 (0.63-1.07) | 0.92 (0.71-1.20) | 0.25        |
| Model3             | 1.00                      | 0.70 (0.56-0.87) | 0.82 (0.63-1.07) | 0.91 (0.70-1.19) | 0.22        |
| Hemorrhagic stroke |                           |                  |                  |                  |             |

|        |      |                  |                  |                  |      |
|--------|------|------------------|------------------|------------------|------|
| Model1 | 1.00 | 1.16 (0.71-1.88) | 0.60 (0.28-1.27) | 1.10 (0.61-1.97) | 0.90 |
| Model2 | 1.00 | 1.29 (0.78-2.13) | 0.69 (0.32-1.51) | 1.36 (0.71-2.62) | 0.55 |
| Model3 | 1.00 | 1.28 (0.78-2.12) | 0.69 (0.31-1.51) | 1.36 (0.70-2.62) | 0.56 |

Linear trend was calculated by treating median values across categories as a continuous variable in the model. Model 1: adjusted for age, sex, educational levels, marital status and retirement status. Model 2: adjusted further for smoking status, alcohol drinking status, physical activity levels, sleep qualities, obesity status, dietary energy intakes and consumption of fruit, vegetables, peanuts, wholegrains, processed and unprocessed meats, bean products, salt and oil. Model 3: adjusted further for histories of chronic diseases, including hypertension, CHD, diabetes, CKD, dyslipidemia, HUA, HHcy, COPD, chronic bronchitis and asthma.

Supplemental Table S3. Hazard ratios (95% CIs) of total stroke, ischemic stroke and hemorrhagic stroke by four categories of fish consumption after excluding the category of shrimp, crab and shellfish

| Total stroke       | Fish consumption (g/week) |                  |                  |                  | P for trend |
|--------------------|---------------------------|------------------|------------------|------------------|-------------|
|                    | Less than 150             | 150-300          | 300-450          | More than 450    |             |
| Model1             | 1.00                      | 0.86 (0.73-1.01) | 0.73 (0.60-0.90) | 0.86 (0.69-1.08) | 0.06        |
| Model2             | 1.00                      | 0.89 (0.74-1.05) | 0.78 (0.63-0.97) | 0.97 (0.76-1.24) | 0.52        |
| Model3             | 1.00                      | 0.89 (0.75-1.06) | 0.77 (0.62-0.96) | 0.96 (0.75-1.22) | 0.44        |
| Ischemic stroke    |                           |                  |                  |                  |             |
| Model1             | 1.00                      | 0.81 (0.67-0.97) | 0.67 (0.54-0.85) | 0.82 (0.64-1.05) | 0.03        |
| Model2             | 1.00                      | 0.83 (0.68-1.00) | 0.71 (0.56-0.91) | 0.91 (0.70-1.20) | 0.27        |
| Model3             | 1.00                      | 0.83 (0.69-1.00) | 0.70 (0.55-0.90) | 0.90 (0.89-1.18) | 0.22        |
| Hemorrhagic stroke |                           |                  |                  |                  |             |
| Model1             | 1.00                      | 1.12 (0.72-1.74) | 0.86 (0.50-1.49) | 0.87 (0.46-1.64) | 0.49        |
| Model2             | 1.00                      | 1.26 (0.80-1.99) | 1.05 (0.58-1.88) | 1.14 (0.57-2.27) | 0.85        |
| Model3             | 1.00                      | 1.25 (0.79-1.97) | 1.02 (0.57-1.84) | 1.13 (0.57-2.24) | 0.89        |

Linear trend was calculated by treating median values across categories as a continuous variable in the model. Model 1: adjusted for age, sex, educational levels, marital status and

retirement status. Model 2: adjusted further for smoking status, alcohol drinking status, physical activity levels, sleep qualities, obesity status, dietary energy intakes and consumption of fruit, vegetables, peanuts, wholegrains, processed and unprocessed meats, bean products, salt and oil. Model 3: adjusted further for histories of chronic diseases, including hypertension, CHD, diabetes, CKD, dyslipidemia, HUA, HHcy, COPD, chronic bronchitis and asthma.
